# Supplementary material for: A single miR390 targeting event is sufficient for triggering TAS3-tasiRNA biogenesis in Arabidopsis
Source: PubMed Central journal article supplement — Nucleic Acids Res. 2017 Feb 21;45(9):5539–54. doi: 10.1093/nar/gkx119 (PMC5435969; doi:10.1093/nar/gkx119), 2017-02-21
Supplement: gkx119_Supp.pdf [file gkx119_Supp.pdf]

Figure S1

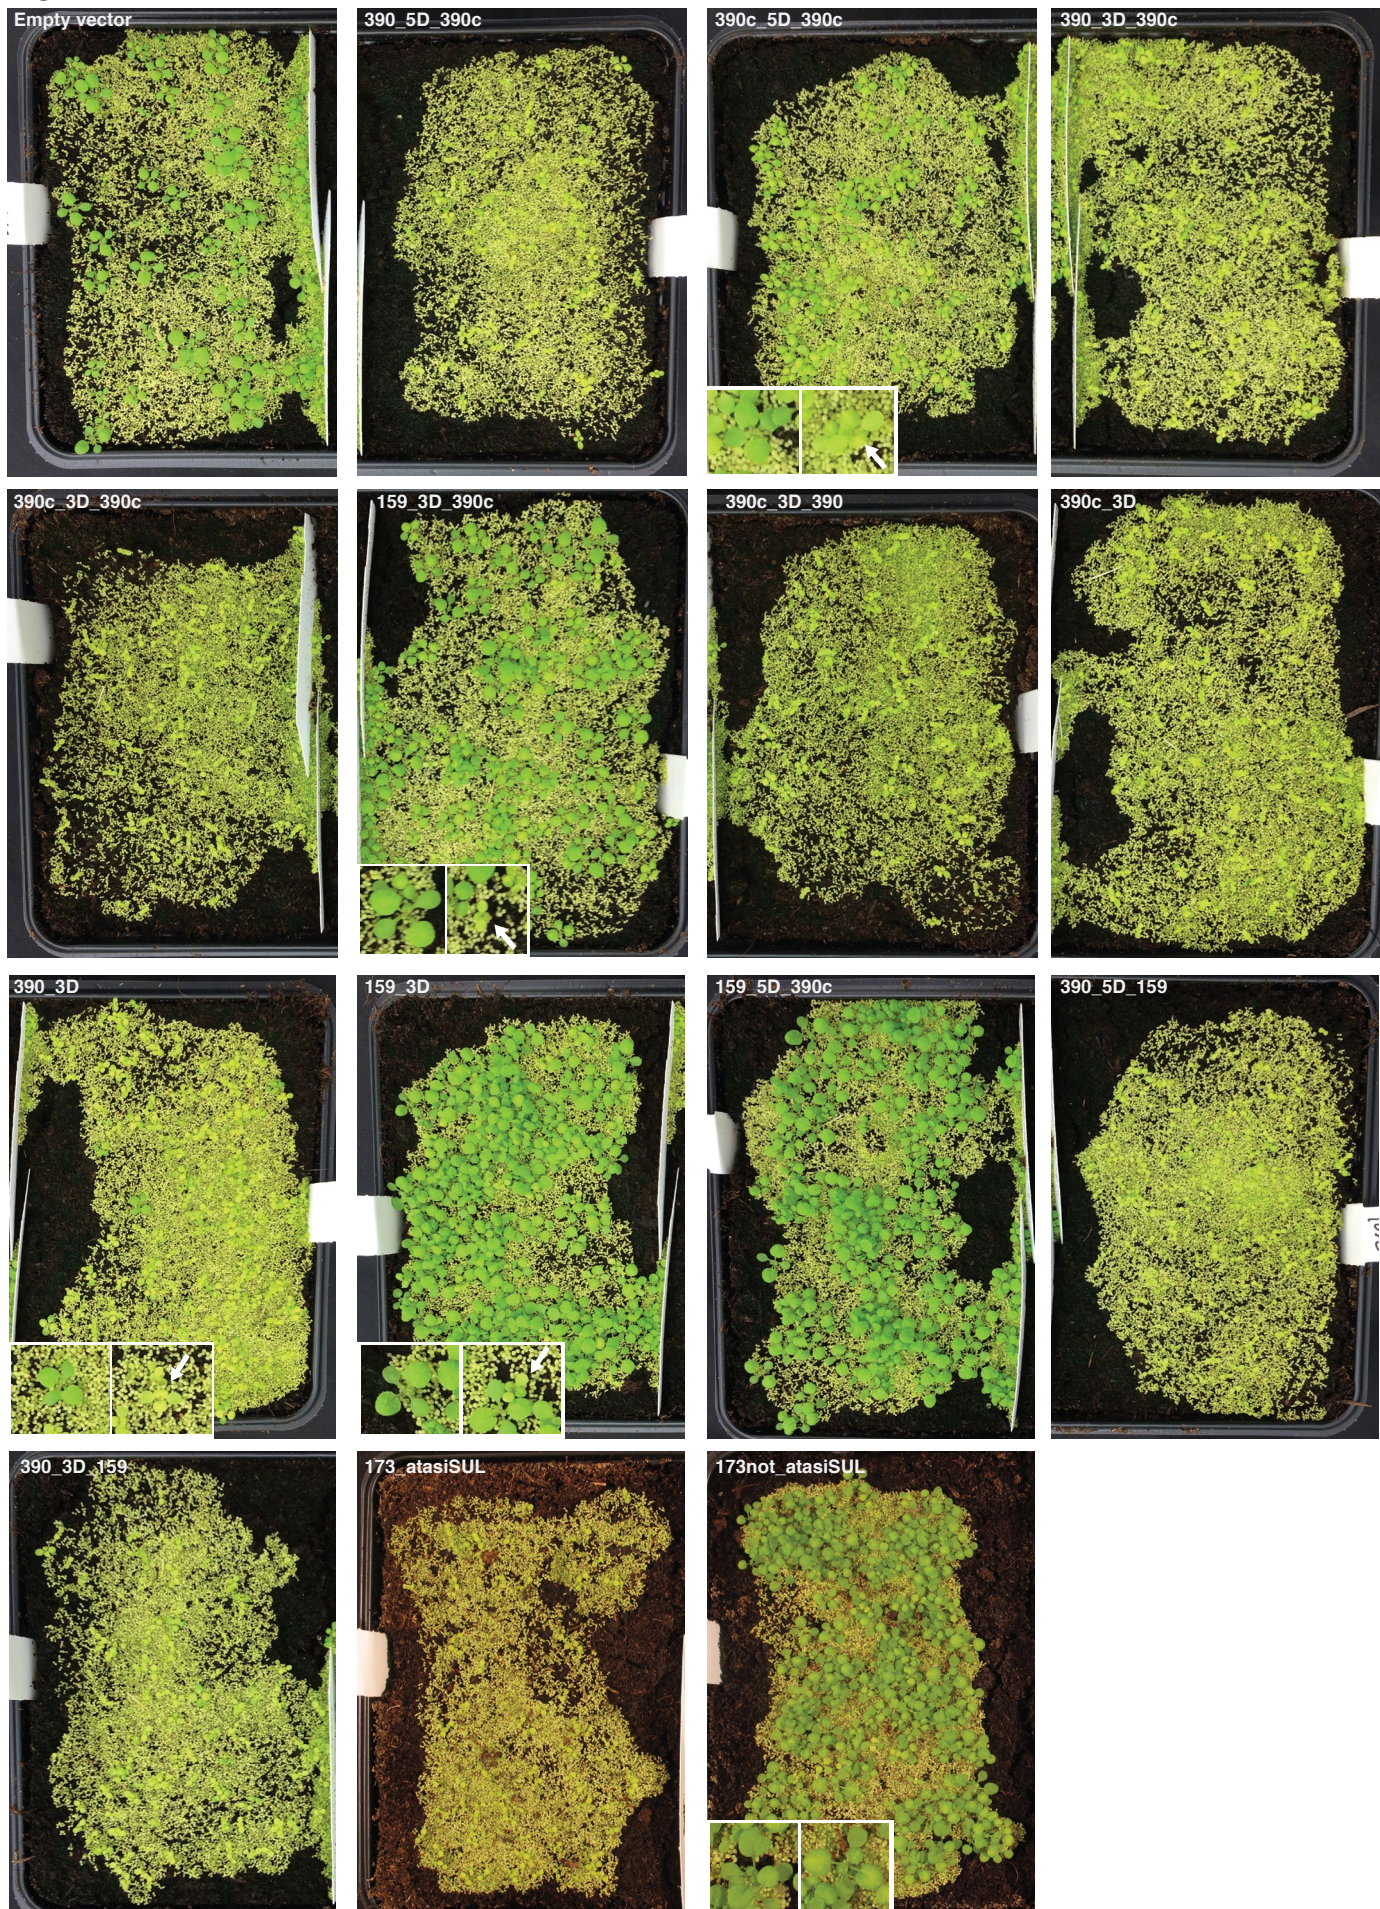



**Figure S1. T1 populations of the various lines used in this study.** 2-weeks old plants were selected on BASTA. In cases where more than one phenotype was observed, magnification is provided, with wild-type-like individuals on the left and bleached individuals on the right. A white arrow points to the referred plant, when necessary.

Figure S2

**A**

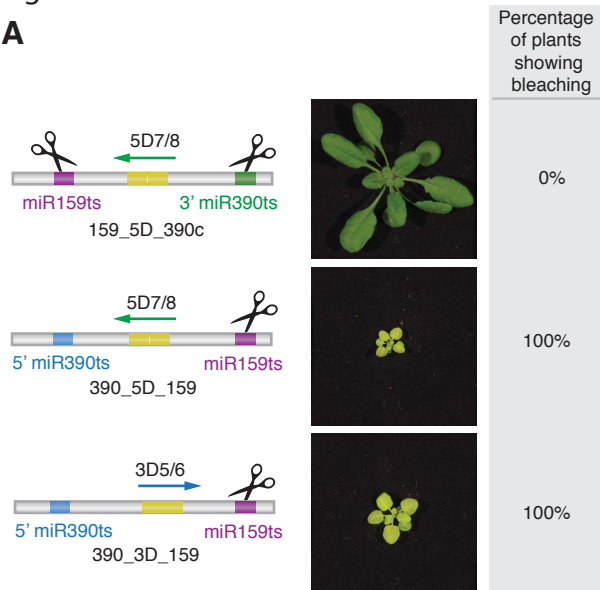

**B**

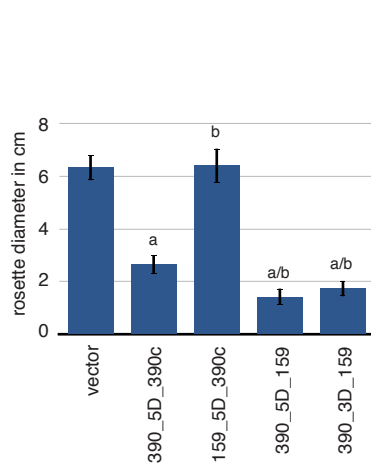

**C**

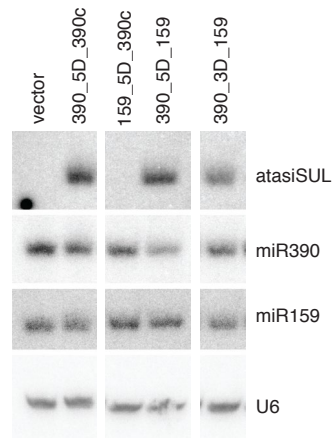

**Figure S2. Single 3' cleavage by miR159 allows TAS3 tasiRNA production.** A) Schematic of the constructs used, representative phenotypes and silencing frequency as in Figure 1-2. The colour code is as in Figure 1-2. B) Quantification of the bleaching intensity by rosette size was performed as in Figure 1. C) Northern blot and RT-qPCR analyses of small RNAs and SUL mRNA steady state levels, respectively, were performed as described in Figure 1.

Figure S3

A

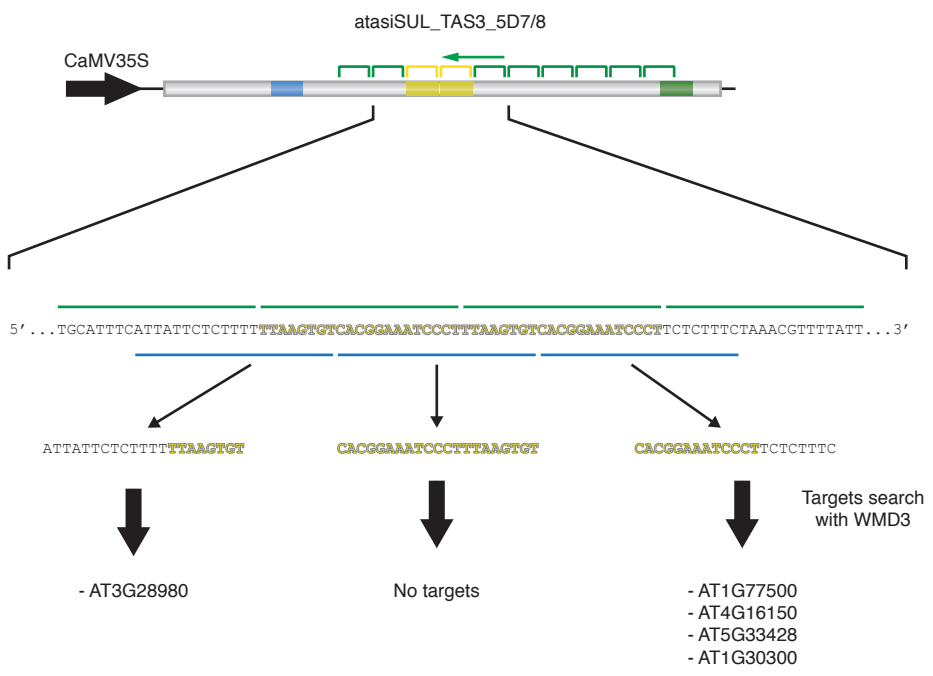

B

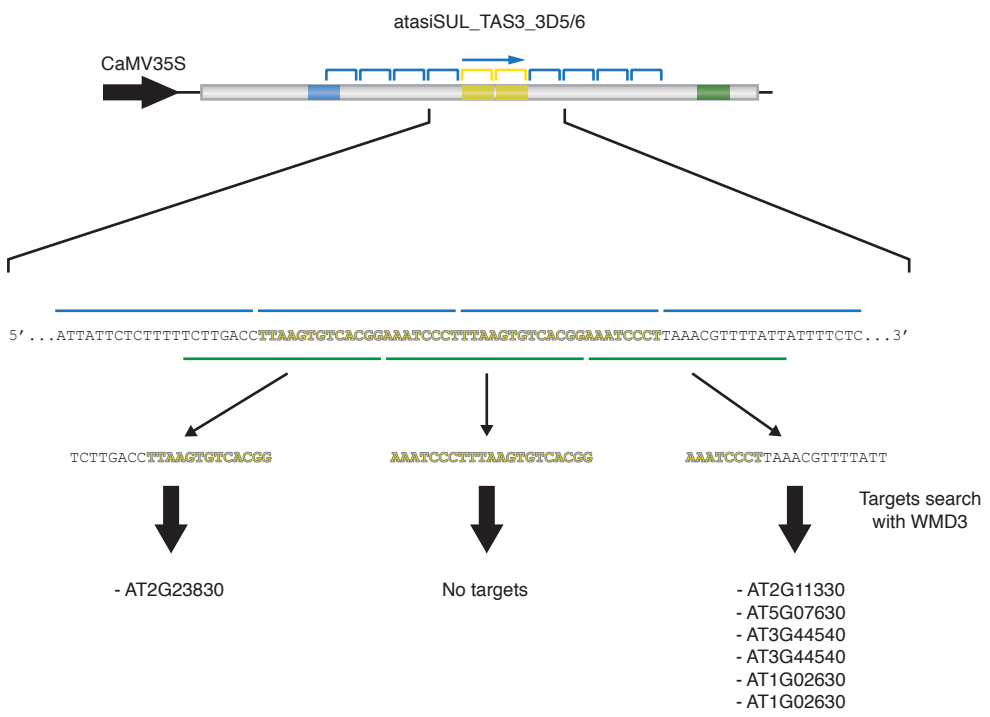

**Figure S3. Prediction of offset siRNA sequences produced by opposing phasing, and of their putative mRNA targets.** A-B) Magnification of the area encoding the atasiSUL siRNA. The bars on the top of the *TAS3a* sequence indicate the correct register for production of the cognate atasiSUL RNA. The bars on the bottom indicate the predicted register resulting from phasing set by the alternative miRNA target site. The predicted siRNAs resulting from the offset phasing are indicated alongside their respective putative mRNA targets, as predicted by the WMD3 algorithm ([wmd3.weigelworld.org](http://wmd3.weigelworld.org) – Schwab et al., 2006, *Plant Cell* 18: 1121-1133).

Figure S4

**A**

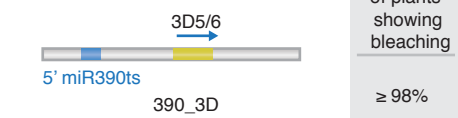

Percentage of plants showing bleaching  
≥ 98%

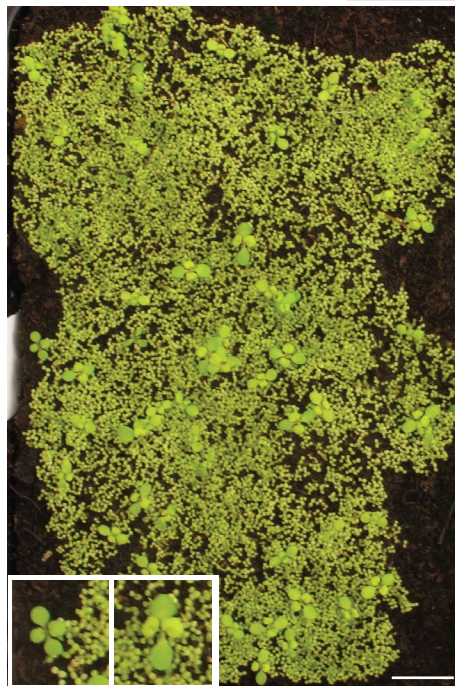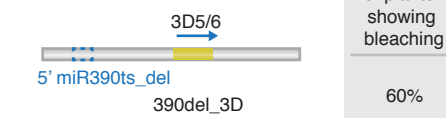

Percentage of plants showing bleaching  
60%

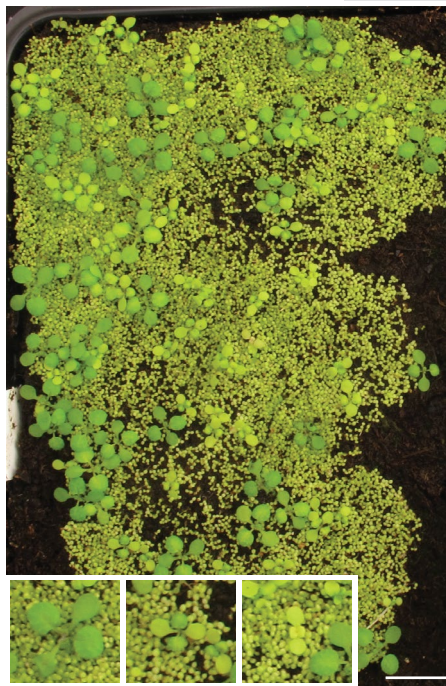

**B**

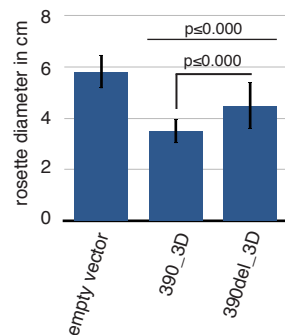

**C**

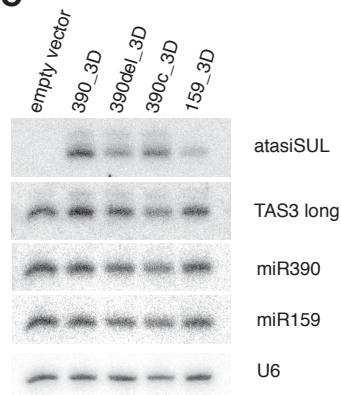

**D**

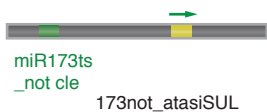

Percentage of plants showing bleaching  
≥ 88%

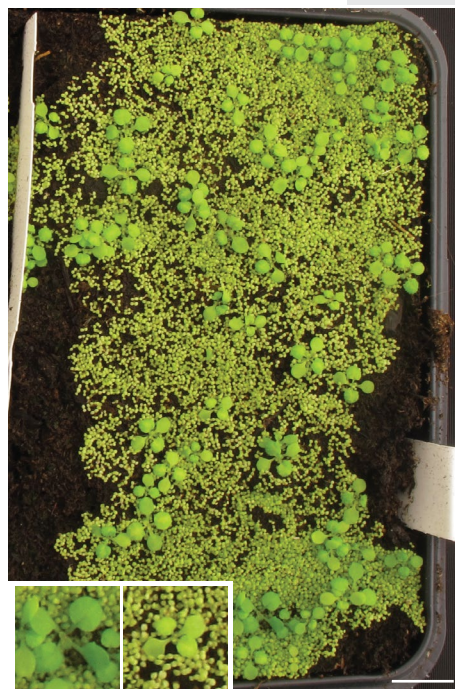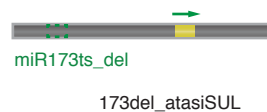

Percentage of plants showing bleaching  
49%

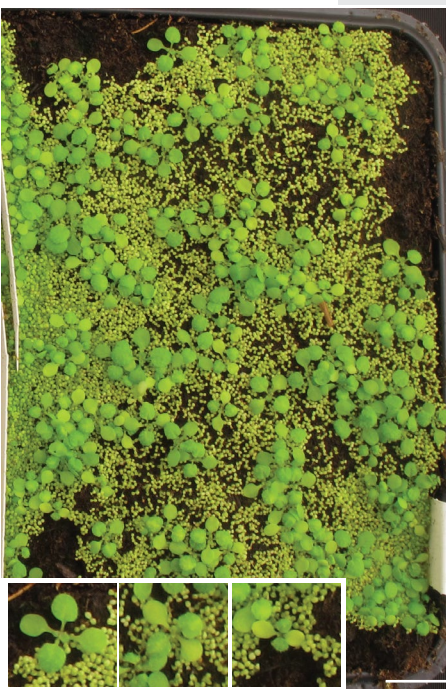

**E**

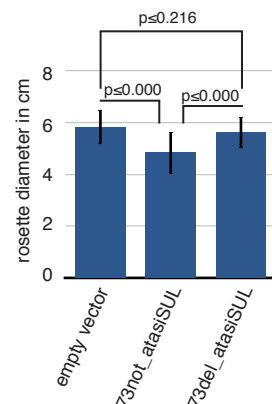

**F**

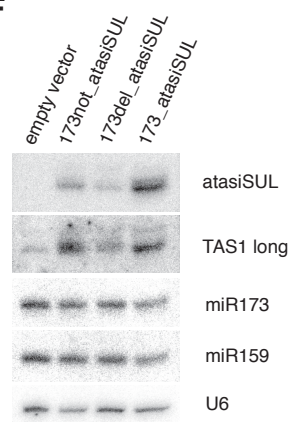

**Figure S4. Impact of co-suppression on the atasiSUL-based reporter systems.** A and D) Populations of T1 plants expressing the TAS3a- (A) or the TAS1-based (D) atasiSUL reporter constructs in which the respective miRNA target sites have been erased are shown on the right. The respective reference T1 populations of plants expressing the cognate non-cleavable sites are shown on the left. The percentage of silencing was calculated based on analysis of at least 50 individual plants in each case. The various phenotypes are depicted in detail in the inlays at the bottom of each panel. B and E) Quantification of bleaching intensity by rosette size measurements of at least 15 individual plants. P-values derived from a t-test (two-sample equal variance; two-tailed distribution) between the different lines and the empty vector control; or between two specific lines are indicated. C and F) Molecular characterization by northern blot was performed as described in Figures 1 and Figure 4.



Figure S5

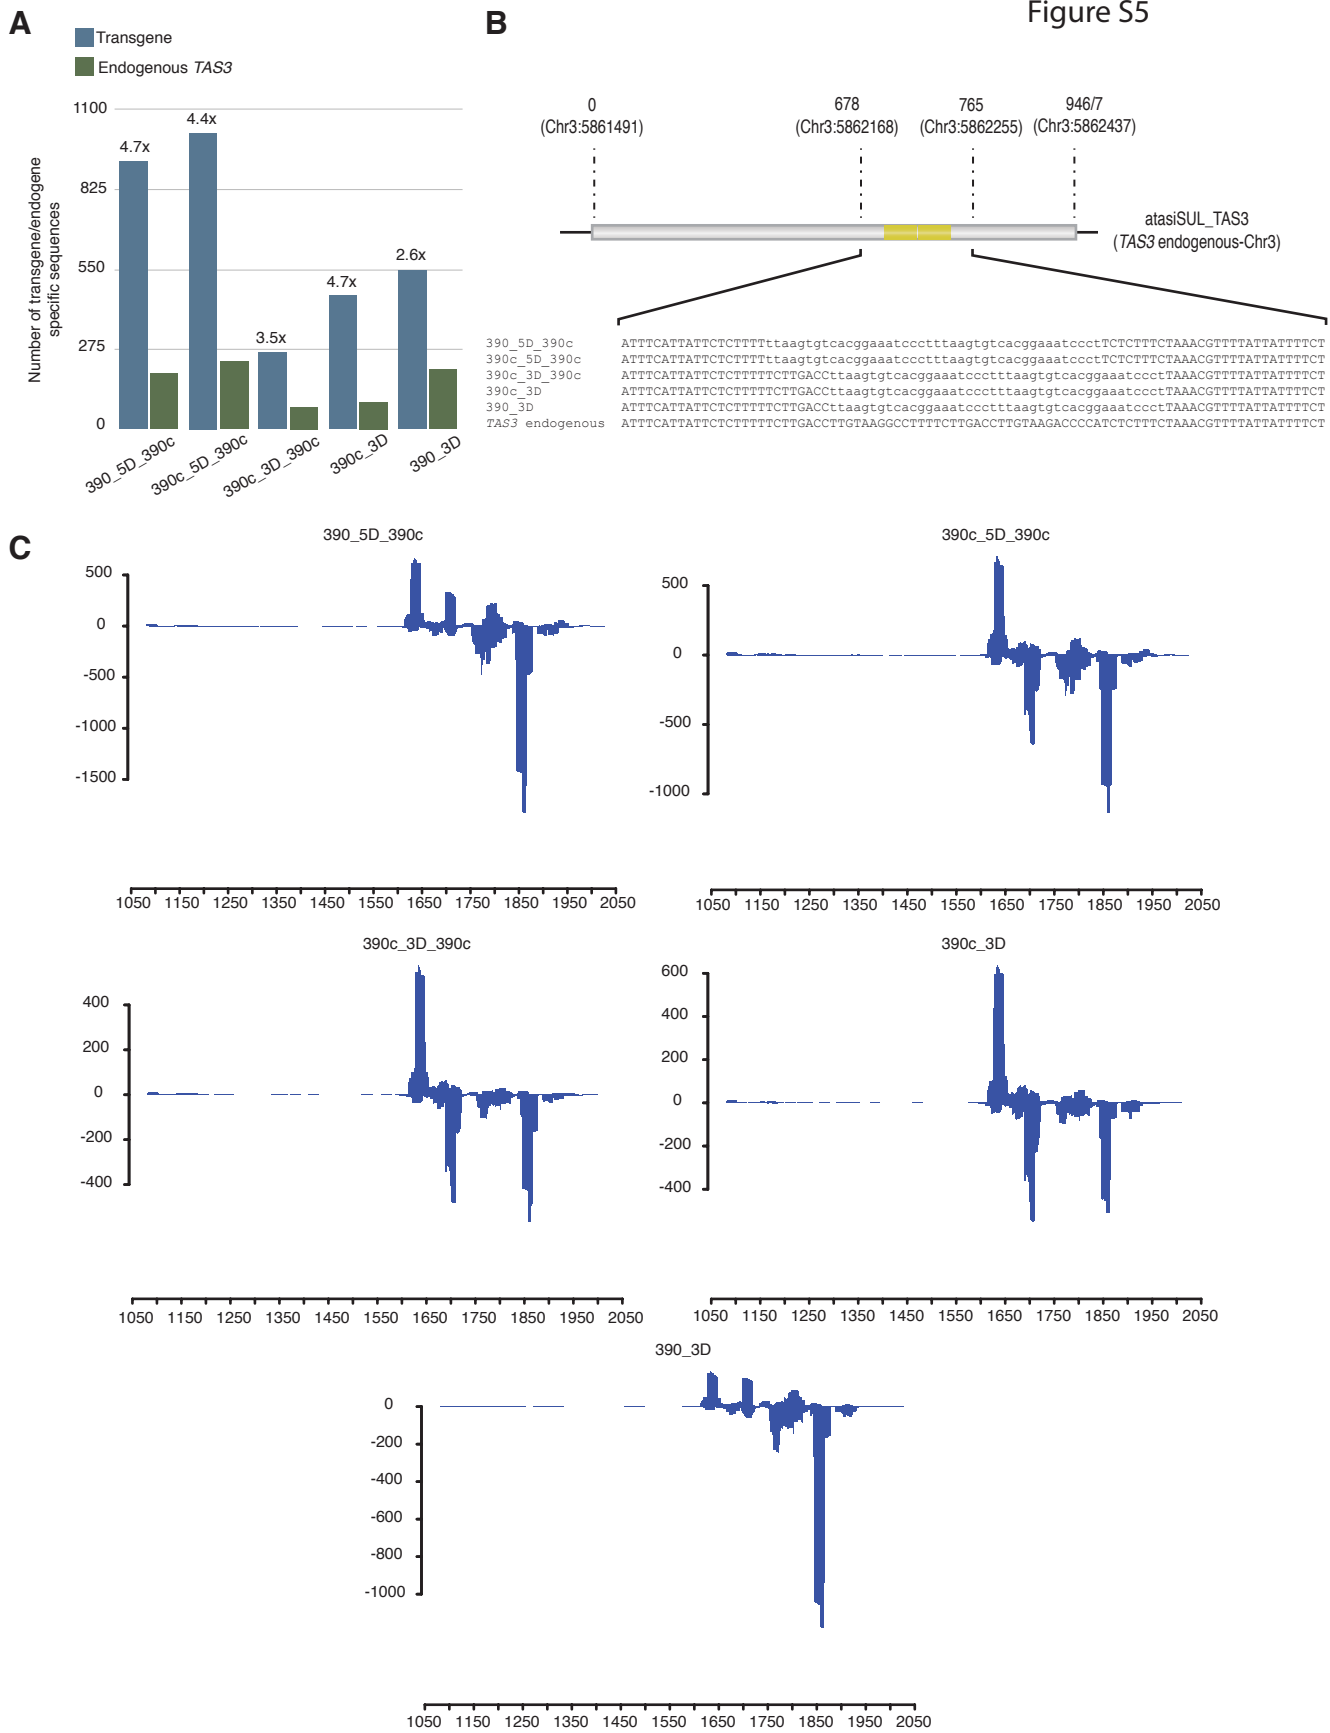

**Figure S5. General overview of the deep sequencing of sRNAs.** A) Amount of sequences originating exclusively from the transgene or the endogenous copy of *TAS3*. The proportion of contribution of the transgene over the endogenous copy is provided. B) Schematic showing the area and the sequence used for the analysis to determine the respective contributions of the reporter transgene and the endogenous *TAS3* to the total amount of tasiRNA species found in the libraries. Relative and chromosomal (between brackets) positions for the transgene and the endogenous copy of *TAS3*, respectively, are indicated. C) Profile of sRNAs mapped to the reporter transgene in the difference lines. Values in the x-axis corresponds to the position on the transgene (bp), y-axis stands for normalized number of reads (in RPM).

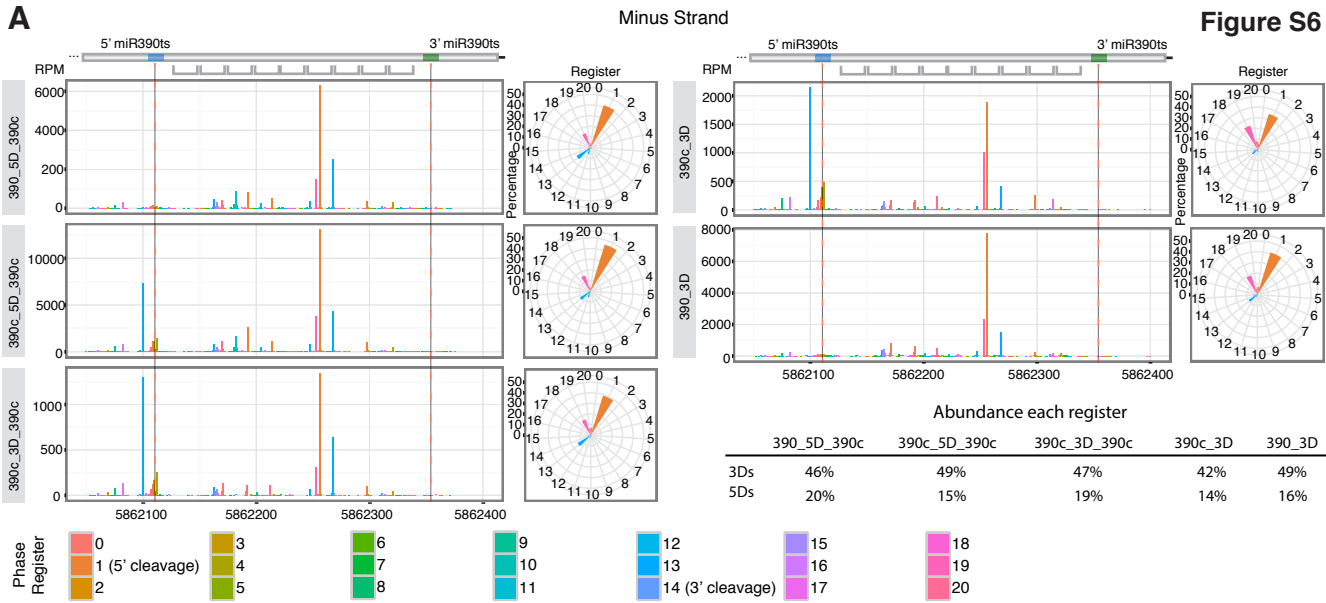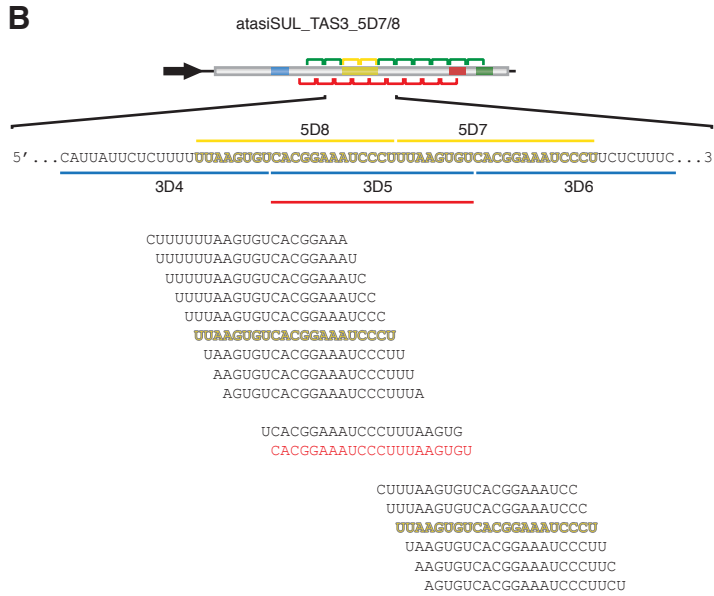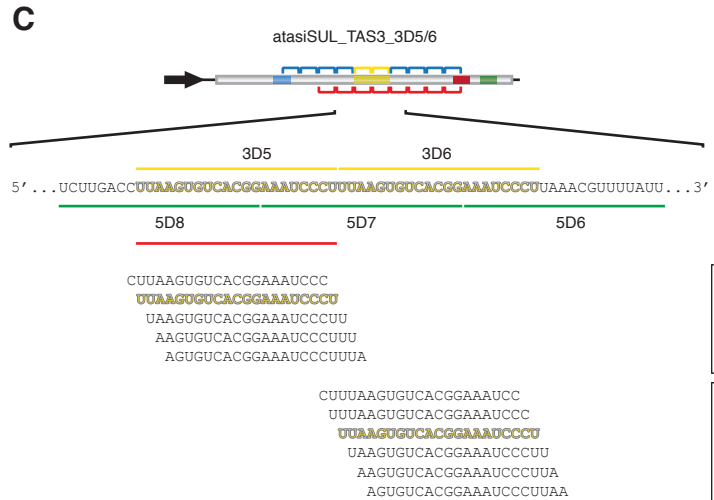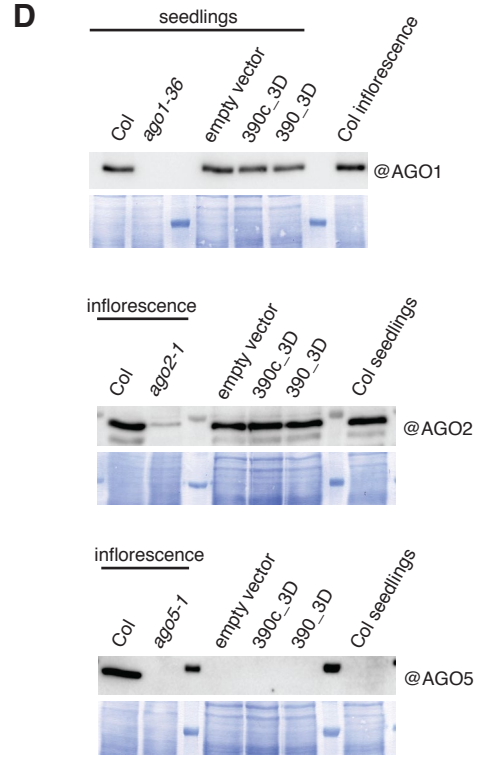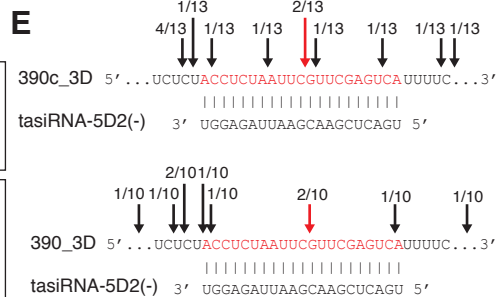



**Figure S6: Supporting information for the deep sequencing analysis of sRNA populations.** A) Distribution of reads mapping the reporter transgene and their respective phase registers. Note that only the region containing both miR390 target sites and sRNAs mapping the minus strand are shown. The different phase registers are represented as a “clock”. The abundance of sRNAs being produced in phase regarding either the miR390 5’- or 3’- target site (3Ds or 5Ds, respectively) is given. For the abundance relative to the 3D and 5D positions, we have considered the predicted, plus 1nt up- and down-stream shifted sequences as the same register). The expected phase register set by cleavage of each of the miR390 target sites is indicated in the colour legend (5’ cleavage and 3’ cleavage). Black arrows indicate the reads corresponding to the atasiSUL. B-C) Schematic representation of the transgene-specific region containing the atasiSUL. In addition to the miR390 sites, tasiRNA-5D2(-) target site as well the predicted phased siRNAs generated are represented in red. Yellow bars and sequences indicate the atasiSUL in positions 5D7/8 (B) or 3D5/6 (C). Putative tasiRNAs generated within the phase register set by cleavage of the miR390 target site not in phase with the atasiSUL sequence are indicated in blue (B) or green (C). tasiRNAs overlapping with the natural site of siR1778 production are indicated in red. Only selected sequences are displayed in the zoomed area together with their respective abundance (ratio of each specific sequence reads over the total reads mapped in the analysed area). Sequences that could potentially target SUL are shown in the boxes, while bold ratios indicate sequences with two different locations. D) Western blot to detect the expression of different AGO proteins using specific antibodies. E) Schematic of the results of the 5’-RACE analysis conducted for different reporter lines. The region containing the tasiRNA-5D2(-) is depicted (including 5-nt up- and down-stream of the target site). The mapped cDNA ends are indicated with black arrows alongside the number of corresponding clones obtained; the predicted tasiRNA-5D2(-) cleavage site is indicated with a red arrow. Mapped cDNA ends located outside the presented area are depicted as single events.

## Supplementary Information for

### **A single miR390 targeting event is sufficient for triggering TAS3-tasiRNA biogenesis in *Arabidopsis*.**

Felipe Fenselau de Felippes, Antonin Marchais, Alexis Sarazin, Stefan Oberlin and Olivier Voinnet

The final sequence of all constructs used in this manuscript is given below. The atasiSUL sRNA targeting *CH42 (SUL)* is shown in **underlined bold letters**. miRNA target sites is represented in *italic underlined*.

#### **390\_5D\_390c**

ATCCCACCGTTTCTTAAGACTCTCTCTCTTTCTGTTTTCTATTTCTCTCTCTCT  
CTCAAATGAAAGAGAGAGAAGAGCTCCCATGGATGAAATTAGCGAGACCGAAGTTTC  
TCCAAGGTGATATGTCTATCTGTATATGTGATACGAAGAGTTAGGGTTTTGTCATTT  
CGAAGTCAATTTTTGTTTGTGTCAATAATGATATCTGAATGATGAAGAACACGTA  
ACTAAGATATGTTACTGAACTATATAATACATATGTGTGTTTTTCTGTATCTATTTTC  
TATATATATGTAGATGTAGTGTAAGTCTGTTATATAGACATTATTCATGTGTACATG  
CATTATACCAACATAAATTTGTATCAATACTACTTTTGATTTACGATGATGGATGTT  
CTTAGATATCTTCATACGTTTTGTTTCCACATGTATTTACAACACTACATATATATTTGG  
AATCACATATATACTTGATTATTATAGTTGTAAAGAGTAACAAGTTCTTTTTTTCAGG  
CATTAAAGGAAAACATAACCTCCGTGATGCATAGAGATTATTGGATCCGCTGTGCTGA  
GACATTGAGTTTTTCTTCGGCATTCCAGTTTCAATGATAAAGCGGTGTTATCCTATC  
TGAGCTTTTAGTCGGATTTTTCTTTTCAATTATTGTGTTTTATCTAGATGATGCAT  
TTCATTATTCTCTTTTT**TTAAGTGTCACGGAAATCCCTTTAAGTGTCACGGAAATCCC**  
**TTCTCTTTCTAAACGTTTTATTATTTCTCGTTTTACAGATTCTATTCTATCTCTTC**  
TCAATATAGAATAGATATCTATCTCTACCTCTAATTCGTTTCGAGTCATTTTCTCCTA  
CCTTGCTATCCCTCCTGAGCTAATCTCCACATATATCTTTTGTGTGTTATTGATGT  
ATGGTTGACATAAATTCAATAAAGAAGTTGACGTTTTTCT

### 390c\_5D\_390c

ATCCCACCGTTTCTTAAGACTCTCTCTCTTTCTGTTTTCTATTTCTCTCTCT  
CTCAAATGAAAGAGAGAGAAGAGCTCCCATGGATGAAATTAGCGAGACCGAAGTTTC  
TCCAAGGTGATATGTCTATCTGTATATGTGATACGAAGAGTTAGGGTTTTGTCATTT  
CGAAGTCAATTTTTGTTTGTGTCAATAATGATATCTGAATGATGAAGAACACGTA  
ACTAAGATATGTTACTGAACTATATAATACATATGTGTGTTTTTCTGTATCTATTTCT  
TATATATATGTAGATGTAGTGTAAGTCTGTTATATAGACATTATTCATGTGTACATG  
CATTATAACCAACATAAATTTGTATCAATACTACTTTTGATTTACGATGATGGATGTT  
CTTAGATATCTTCATACGTTTGTTCACATGTATTTACAACACTACATATATATTTGG  
AATCACATATATACTTGATTATTATAGTTGTAAAGAGTAACAAGTTCTTTTTTTCAGG  
CATTAAAGGAAAACATAACCTCCGTGATGCATAGAGATTATTGGATCCGCTGTGCTGA  
GACATTGAGTTTTTCTTCGGCATTCCAGTTTCAATGATAAAGCGGCGCTATCCCTAC  
TGAGCTTTTAGTCGGATTTTTTCTTTTCAATTATTGTGTTTTATCTAGATGATGCAT  
TTCATTATTCTCTTTTT**TTAAGTGTCACGGAAATCCCTTTAAGTGTCACGGAAATCCC**  
**TTCTCTTTCTAAACGTTTTATTATTTTCTCGTTTTACAGATTCTATTCTATCTCTTC**  
TCAATATAGAATAGATATCTATCTCTACCTCTAATTCGTTTCGAGTCATTTTCTCCTA  
CCTTGCTATCCCTCCTGAGCTAATCTCCACATATATCTTTTGTGTATTGATGT  
ATGGTTGACATAAATTCAATAAAGAAGTTGACGTTTTTCT

### 390\_3D\_390c

ATCCCACCGTTTCTTAAGACTCTCTCTCTTTCTGTTTTCTATTTCTCTCTCT  
CTCAAATGAAAGAGAGAGAAGAGCTCCCATGGATGAAATTAGCGAGACCGAAGTTTC  
TCCAAGGTGATATGTCTATCTGTATATGTGATACGAAGAGTTAGGGTTTTGTCATTT  
CGAAGTCAATTTTTGTTTGTGTCAATAATGATATCTGAATGATGAAGAACACGTA  
ACTAAGATATGTTACTGAACTATATAATACATATGTGTGTTTTTCTGTATCTATTTCT  
TATATATATGTAGATGTAGTGTAAGTCTGTTATATAGACATTATTCATGTGTACATG  
CATTATAACCAACATAAATTTGTATCAATACTACTTTTGATTTACGATGATGGATGTT  
CTTAGATATCTTCATACGTTTGTTCACATGTATTTACAACACTACATATATATTTGG  
AATCACATATATACTTGATTATTATAGTTGTAAAGAGTAACAAGTTCTTTTTTTCAGG  
CATTAAAGGAAAACATAACCTCCGTGATGCATAGAGATTATTGGATCCGCTGTGCTGA  
GACATTGAGTTTTTCTTCGGCATTCCAGTTTCAATGATAAAGCGGTGTTATCCTATC  
TGAGCTTTTAGTCGGATTTTTTCTTTTCAATTATTGTGTTTTATCTAGATGATGCAT  
TTCATTATTCTCTTTTTTCTTGACC**TTAAGTGTCACGGAAATCCCTTTAAGTGTCACG**  
**GAAATCCCT**TAAACGTTTTATTATTTTCTCGTTTTACAGATTCTATTCTATCTCTTC



TCAATATAGAATAGATATCTATCTCTACCTCTAATTCGTTTCGAGTCATTTTCTCCTA  
CCTTGTCTATCCCTCCTGAGCTAATCTCCACATATATCTTTTGTGGTTATTGATGT  
ATGGTTGACATAAATTCAATAAAGAAGTTGACGTTTTTCT

### **390c\_3D\_390c**

ATCCCACCGTTTCTTAAGACTCTCTCTCTTTCTGTTTTCTATTTCTCTCTCT  
CTCAAATGAAAGAGAGAGAAGAGCTCCCATGGATGAAATTAGCGAGACCGAAGTTTC  
TCCAAGGTGATATGTCTATCTGTATATGTGATACGAAGAGTTAGGGTTTTGTCATTT  
CGAAGTCAATTTTTGTGGTTGTCAATAATGATATCTGAATGATGAAGAACACGTA  
ACTAAGATATGTTACTGAACTATATAATACATATGTGTGTTTTTCTGTATCTATTTCT  
TATATATATGTAGATGTAGTGTAAGTCTGTTATATAGACATTATTCATGTGTACATG  
CATTATACCAACATAAATTTGTATCAATACTACTTTTGATTTACGATGATGGATGTT  
CTTAGATATCTTCATACGTTTGTTCACATGTATTTACAACACTACATATATATTTGG  
AATCACATATATACTTGATTATTATAGTTGTAAAGAGTAACAAGTTCTTTTTTTCAGG  
CATTAAAGGAAAACATAACCTCCGTGATGCATAGAGATTATTGGATCCGCTGTGCTGA  
GACATTGAGTTTTTCTTCGGCATTCCAGTTTCAATGATAAAGCGGCGCTATCCCTAC  
TGAGCTTTTAGTCGGATTTTTTCTTTTCAATTATTGTGTTTTATCTAGATGATGCAT  
TTCATTATTCTCTTTTTCTTGACC**TTAAGTGTCACGGAAATCCCTTTAAGTGTCAG**  
**GAAATCCCT**TAAACGTTTTATTATTTCTCGTTTTACAGATTCTATTCTATCTCTTC  
TCAATATAGAATAGATATCTATCTCTACCTCTAATTCGTTTCGAGTCATTTTCTCCTA  
CCTTGTCTATCCCTCCTGAGCTAATCTCCACATATATCTTTTGTGGTTATTGATGT  
ATGGTTGACATAAATTCAATAAAGAAGTTGACGTTTTTCT

### **159\_3D\_390c**

ATCCCACCGTTTCTTAAGACTCTCTCTCTTTCTGTTTTCTATTTCTCTCTCT  
CTCAAATGAAAGAGAGAGAAGAGCTCCCATGGATGAAATTAGCGAGACCGAAGTTTC  
TCCAAGGTGATATGTCTATCTGTATATGTGATACGAAGAGTTAGGGTTTTGTCATTT  
CGAAGTCAATTTTTGTGGTTGTCAATAATGATATCTGAATGATGAAGAACACGTA  
ACTAAGATATGTTACTGAACTATATAATACATATGTGTGTTTTTCTGTATCTATTTCT  
TATATATATGTAGATGTAGTGTAAGTCTGTTATATAGACATTATTCATGTGTACATG  
CATTATACCAACATAAATTTGTATCAATACTACTTTTGATTTACGATGATGGATGTT  
CTTAGATATCTTCATACGTTTGTTCACATGTATTTACAACACTACATATATATTTGG  
AATCACATATATACTTGATTATTATAGTTGTAAAGAGTAACAAGTTCTTTTTTTCAGG  
CATTAAAGGAAAACATAACCTCCGTGATGCATAGAGATTATTGGATCCGCTGTGCTGA

GACATTGAGTTTTTCTTCGGCATTCCAGTTTCAATGATAAAGC TAGAGCTCCCTTCA  
ATCCAAATTAGTCGGATTTTTCTTTTCAATTATTGTGTTTTATCTAGATGATGCAT  
TTCATTATTCTCTTTTTCTTGACC **TTAAGTGTCACGGAAATCCCTTTAAGTGTCACG**  
**GAAATCCCT**TAAACGTTTTATTATTTTCTCGTTTTACAGATTCTATTCTATCTCTTC  
TCAATATAGAATAGATATCTATCTCTACCTCTAATTCGTTTCGAGTCATTTTCTCCTA  
CCTTGCTATCCCTCCTGAGCTAATCTCCACATATATCTTTTGTTTGTTATTGATGT  
ATGGTTGACATAAATTCAATAAAGAAGTTGACGTTTTTCT

### 390c\_3D\_390

ATCCCACCGTTTCTTAAGACTCTCTCTCTTTCTGTTTTCTATTTCTCTCTCT  
CTCAAATGAAAGAGAGAGAAGAGCTCCCATGGATGAAATTAGCGAGACCGAAGTTTC  
TCCAAGGTGATATGTCTATCTGTATATGTGATACGAAGAGTTAGGGTTTTGTCATTT  
CGAAGTCAATTTTTGTTTGTTGTCAATAATGATATCTGAATGATGAAGAACACGTA  
ACTAAGATATGTTACTGAACTATATAATACATATGTGTGTTTTTCTGTATCTATTTCT  
TATATATATGTAGATGTAGTGTAAGTCTGTTATATAGACATTATTCATGTGTACATG  
CATTATACCAACATAAATTTGTATCAATACTACTTTTGATTTACGATGATGGATGTT  
CTTAGATATCTTCATACGTTTTGTTCCACATGTATTTACAACACTACATATATTTGG  
AATCACATATATACTTGATTATTATAGTTGTAAAGAGTAACAAGTTCTTTTTTTCAGG  
CATTAAAGGAAAACATAACCTCCGTGATGCATAGAGATTATTGGATCCGCTGTGCTGA  
GACATTGAGTTTTTCTTCGGCATTCCAGTTTCAATGATAAAGC GGCGCTATCCCTAC  
TGAGCTTTTAGTCGGATTTTTCTTTTCAATTATTGTGTTTTATCTAGATGATGCAT  
TTCATTATTCTCTTTTTCTTGACC **TTAAGTGTCACGGAAATCCCTTTAAGTGTCACG**  
**GAAATCCCT**TAAACGTTTTATTATTTTCTCGTTTTACAGATTCTATTCTATCTCTTC  
TCAATATAGAATAGATATCTATCTCTACCTCTAATTCGTTTCGAGTCATTTTCTCCTA  
CGGTGTTATCCTATCTGAGCTTATCTCCACATATATCTTTTGTTTGTTATTGATGTA  
TGTTGACATAAATTCAATAAAGAAGTTGACGTTTTTCT

### 390c\_3D

ATCCCACCGTTTCTTAAGACTCTCTCTCTTTCTGTTTTCTATTTCTCTCTCT  
CTCAAATGAAAGAGAGAGAAGAGCTCCCATGGATGAAATTAGCGAGACCGAAGTTTC  
TCCAAGGTGATATGTCTATCTGTATATGTGATACGAAGAGTTAGGGTTTTGTCATTT  
CGAAGTCAATTTTTGTTTGTTGTCAATAATGATATCTGAATGATGAAGAACACGTA  
ACTAAGATATGTTACTGAACTATATAATACATATGTGTGTTTTTCTGTATCTATTTCT  
TATATATATGTAGATGTAGTGTAAGTCTGTTATATAGACATTATTCATGTGTACATG

CATTATACCAACATAAATTTGTATCAATACTACTTTTGATTTACGATGATGGATGTT  
CTTAGATATCTTCATACGTTTGTTCACATGTATTTACAACACTACATATATATTTGG  
AATCACATATATACTTGATTATTATAGTTGTAAAGAGTAACAAGTTCTTTTTTCAGG  
CATTAAAGGAAAACATAACCTCCGTGATGCATAGAGATTATTGGATCCGCTGTGCTGA  
GACATTGAGTTTTTCTTCGGCATTCCAGTTTCAATGATAAAGCGGCGCTATCCCTAC  
TGAGCTTTTAGTCGGATTTTTCTTTTCAATTATTGTGTTTTATCTAGATGATGCAT  
TTCATTATTCTCTTTTTCTTGACC**TTAAGTGTCACGGAAATCCCTTTAAGTGTCACG**  
**GAAATCCCT**TAAACGTTTTATTATTTCTCGTTTTACAGATTCTATTCTATCTCTTC  
TCAATATAGAATAGATATCTATCTCTACCTCTAATTCGTTTCGAGTCATTTTCTCCTA  
CACACGATAGGGAGAGATAGAAATCTCCACATATATCTTTTGTGGTTATTGATGTA  
TGTTGACATAAATTCAATAAAGAAGTTGACGTTTTTCT

### 390\_3D

ATCCCACCGTTTCTTAAGACTCTCTCTCTTTCTGTTTTCTATTTCTCTCTCT  
CTCAAATGAAAGAGAGAGAAGAGCTCCCATGGATGAAATTAGCGAGACCGAAGTTTC  
TCCAAGGTGATATGTCTATCTGTATATGTGATACGAAGAGTTAGGGTTTTGTCATTT  
CGAAGTCAATTTTTGTTTGTTCATAAATGATATCTGAATGATGAAGAACACGTA  
ACTAAGATATGTTACTGAACACTATAATAACATATGTGTGTTTTTCTGTATCTATTTCT  
TATATATATGTAGATGTAGTGTAAGTCTGTTATATAGACATTATTCATGTGTACATG  
CATTATACCAACATAAATTTGTATCAATACTACTTTTGATTTACGATGATGGATGTT  
CTTAGATATCTTCATACGTTTGTTCACATGTATTTACAACACTACATATATATTTGG  
AATCACATATATACTTGATTATTATAGTTGTAAAGAGTAACAAGTTCTTTTTTCAGG  
CATTAAAGGAAAACATAACCTCCGTGATGCATAGAGATTATTGGATCCGCTGTGCTGA  
GACATTGAGTTTTTCTTCGGCATTCCAGTTTCAATGATAAAGCGGTGTTATCCTATC  
TGAGCTTTTAGTCGGATTTTTCTTTTCAATTATTGTGTTTTATCTAGATGATGCAT  
TTCATTATTCTCTTTTTCTTGACC**ttaagtgtcacggaaatccctttaagtgtcacg**  
**gaaatccct**TAAACGTTTTATTATTTCTCGTTTTACAGATTCTATTCTATCTCTTC  
TCAATATAGAATAGATATCTATCTCTACCTCTAATTCGTTTCGAGTCATTTTCTCCTA  
CACACGATAGGGAGAGATAGAAATCTCCACATATATCTTTTGTGGTTATTGATGTA  
TGTTGACATAAATTCAATAAAGAAGTTGACGTTTTTCT

### 159\_3D

ATCCCACCGTTTCTTAAGACTCTCTCTCTTTCTGTTTTCTATTTCTCTCTCT  
CTCAAATGAAAGAGAGAGAAGAGCTCCCATGGATGAAATTAGCGAGACCGAAGTTTC



TCCAAGGTGATATGTCTATCTGTATATGTGATACGAAGAGTTAGGGTTTTGTCATTT  
CGAAGTCAATTTTTGTTTGTGTCAATAATGATATCTGAATGATGAAGAACACGTA  
ACTAAGATATGTTACTGAACTATATAATACATATGTGTGTTTTTCTGTATCTATTTT  
TATATATATGTAGATGTAGTGTAAGTCTGTTATATAGACATTATTCATGTGTACATG  
CATTATAACCAACATAAATTTGTATCAATACTACTTTTGATTTACGATGATGGATGTT  
CTTAGATATCTTCATACGTTTGTTCACATGTATTTACAACACTACATATATATTTGG  
AATCACATATATACTTGATTATTATAGTTGTAAAGAGTAACAAGTTCTTTTTTTCAGG  
CATTAAAGGAAAACATAACCTCCGTGATGCATAGAGATTATTGGATCCGCTGTGCTGA  
GACATTGAGTTTTTCTTCGGCATTCCAGTTTCAATGATAAAGCTAGAGCTCCCTTCA  
ATCCAAATTAGTCGGATTTTTTCTTTTCAATTATTGTGTTTTATCTAGATGATGCAT  
TTCATTATTCTCTTTTTCTTGACC**TTAAGTGTCACGGAAATCCCTTTAAGTGTCACG**  
**GAAATCCCT**TAAACGTTTTATTATTTCTCGTTTTACAGATTCTATTCTATCTCTTC  
TCAATATAGAATAGATATCTATCTCTACCTCTAATTCGTTTCGAGTCATTTTCTCCTA  
CACACGATAGGGAGAGATAGAAATCTCCACATATATCTTTTGTGGTTATTGATGTA  
TGTTGACATAAATTCAATAAAGAAGTTGACGTTTTTCT

### 390del\_3D

ATCCCACCGTTTCTTAAGACTCTCTCTCTTTCTGTTTTCTATTTCTCTCTCT  
CTCAAATGAAAGAGAGAGAAGAGCTCCCATGGATGAAATTAGCGAGACCGAAGTTTC  
TCCAAGGTGATATGTCTATCTGTATATGTGATACGAAGAGTTAGGGTTTTGTCATTT  
CGAAGTCAATTTTTGTTTGTGTCAATAATGATATCTGAATGATGAAGAACACGTA  
ACTAAGATATGTTACTGAACTATATAATACATATGTGTGTTTTTCTGTATCTATTTT  
TATATATATGTAGATGTAGTGTAAGTCTGTTATATAGACATTATTCATGTGTACATG  
CATTATAACCAACATAAATTTGTATCAATACTACTTTTGATTTACGATGATGGATGTT  
CTTAGATATCTTCATACGTTTGTTCACATGTATTTACAACACTACATATATATTTGG  
AATCACATATATACTTGATTATTATAGTTGTAAAGAGTAACAAGTTCTTTTTTTCAGG  
CATTAAAGGAAAACATAACCTCCGTGATGCATAGAGATTATTGGATCCGCTGTGCTGA  
GACATTGAGTTTTTCTTCGGCATTCCAGTTTCAATGATAAAGCCCGCGATAGGGAGG  
ACTCGAATTAGTCGGATTTTTTCTTTTCAATTATTGTGTTTTATCTAGATGATGCAT  
TTCATTATTCTCTTTTTCTTGACC**TTAAGTGTCACGGAAATCCCTTTAAGTGTCACG**  
**GAAATCCCT**TAAACGTTTTATTATTTCTCGTTTTACAGATTCTATTCTATCTCTTC  
TCAATATAGAATAGATATCTATCTCTACCTCTAATTCGTTTCGAGTCATTTTCTCCTA  
CACACGATAGGGAGAGATAGAAATCTCCACATATATCTTTTGTGGTTATTGATGTA  
TGTTGACATAAATTCAATAAAGAAGTTGACGTTTTTCT

### 159\_5D\_390c

ATCCCACCGTTTCTTAAGACTCTCTCTCTTTCTGTTTTCTATTTCTCTCTCT  
CTCAAATGAAAGAGAGAGAAGAGCTCCCATGGATGAAATTAGCGAGACCGAAGTTTC  
TCCAAGgtgatatgtctatctgtatatgtgatacgaagagttagggttttgtcattt  
cgaagtcaatTTTTGTTTGTGTTGTCAATAATGATATCTGAATGATGAAGAACACGTA  
actaagatatgttactgaactatataatacatatgtgtgtTTTTctgtatctatttc  
tatatatatgtagatgtagtgtaagtctgttatatagacattattcatgtgtacatg  
cattataccaacataaatttGTATCAATACTACTTTTGATTACGATGATGGATGTT  
cttagatatcttcatacgtttgtttccacatgtatttacaactacatatatatttg  
aatcacatatatacttgattattatagttgtaaagagtaacaagttctTTTTcagG  
CATTAAGGAAAACATAACCTCCGTGATGCATAGAGATTATTGGATCCGCTGTGCTGA  
GACATTGAGTTTTTCTTCGGCATTCCAGTTTCAATGATAAAGCtagagctcccttca  
atccaaaTTAGTCGGATTTTTCTTTCAATTATTGTGTTTTATCTAGATGATGCAT  
TTCATTATTCTCTTTT**ttaagtgtcacggaaatccctttaagtgtcacggaaatccc**  
**t**TCTCTTTCTAAACGTTTTATTATTTCTCGTTTTACAGATTCTATTCTATCTCTTC  
TCAATATAGAATAGATATCTATCTCTACCTCTAATTCGTTTCGAGTCATTTTCTCCTA  
CCTTGTCTATCCCTCCTGAGCTAATCTCCACATATATCTTTGTTTGTATTGATGT  
ATGGTTGACATAAATTCAATAAAGAAGTTGACGTTTTTCT

### 390\_5D\_159

ATCCCACCGTTTCTTAAGACTCTCTCTCTTTCTGTTTTCTATTTCTCTCTCT  
CTCAAATGAAAGAGAGAGAAGAGCTCCCATGGATGAAATTAGCGAGACCGAAGTTTC  
TCCAAGGTGATATGTCTATCTGTATATGTGATACGAAGAGTTAGGGTTTTGTCATTT  
CGAAGTCAATTTTTGTTTGTGTTGTCAATAATGATATCTGAATGATGAAGAACACGTA  
ACTAAGATATGTTACTGAACTATATAATACATATGTGTGTTTTTCTGTATCTATTTCT  
TATATATATGTAGATGTAGTGTAAGTCTGTTATATAGACATTATTCATGTGTACATG  
CATTATACCAACATAAATTTGTATCAATACTACTTTTGATTACGATGATGGATGTT  
CTTAGATATCTTCATACGTTTGTGTTCCACATGTATTTACAACACTACATATATATTTGG  
AATCACATATATACTTGATTATTATAGTTGTAAGAGTAACAAGTTCTTTTTTTCAGG  
CATTAAGGAAAACATAACCTCCGTGATGCATAGAGATTATTGGATCCGCTGTGCTGA  
GACATTGAGTTTTTCTTCGGCATTCCAGTTTCAATGATAAAGCGGTGTATCCTATC

TGAGCTTTTAGTCGGATTTTTCTTTCAATTATTGTGTTTTATCTAGATGATGCAT  
TTCATTATTCTCTTTTT**TTAAGTGTCACGGAAATCCCTTTAAGTGTCACGGAAATCCC**  
**TTCTCTTTCTAAACGTTTTATTATTTCTCGTTTTACAGATTCTATTCTATCTCTTC**  
TCAATATAGAATAGATATCTATCTCTACCTCTAATTCGTTTCGAGTCATTTTCTCCTA  
CCTAGAGCTCCCTTCAATCCAAAATCTCCACATATATCTTTTGTTTGTATTGATGT  
ATGGTTGACATAAATTCAATAAAGAAGTTGACGTTTTTCT

### **390\_3D\_159**

ATCCCACCGTTTCTTAAGACTCTCTCTTTCTGTTTTCTATTTCTCTCTCT  
CTCAAATGAAAGAGAGAGAAGAGCTCCCATGGATGAAATTAGCGAGACCGAAGTTTC  
TCCAAGGTGATATGTCTATCTGTATATGTGATACGAAGAGTTAGGGTTTTGTCATTT  
CGAAGTCAATTTTTGTTTGTTCATAAATGATATCTGAATGATGAAGAACACGTA  
ACTAAGATATGTTACTGAACTATATAATACATATGTGTGTTTTTCTGTATCTATTTCT  
TATATATATGTAGATGTAGTGTAAGTCTGTTATATAGACATTATTCATGTGTACATG  
CATTATACCAACATAAATTTGTATCAATACTACTTTTGATTTACGATGATGGATGTT  
CTTAGATATCTTCATACGTTTGTTCACATGTATTTACAACACTACATATATATTTGG  
AATCACATATACTTGATTATTATAGTTGTAAAGAGTAACAAGTTCTTTTTTTCAGG  
CATTAAAGGAAAACATAACCTCCGTGATGCATAGAGATTATTGGATCCGCTGTGCTGA  
GACATTGAGTTTTTCTTCGGCATTCCAGTTTCAATGATAAAGCGGTGTTATCCTATC  
TGAGCTTTTAGTCGGATTTTTCTTTCAATTATTGTGTTTTATCTAGATGATGCAT  
TTCATTATTCTCTTTTTCTTGACC**TTAAGTGTCACGGAAATCCCTTTAAGTGTCACG**  
**GAAATCCCT**TAAACGTTTTATTATTTCTCGTTTTACAGATTCTATTCTATCTCTTC  
TCAATATAGAATAGATATCTATCTCTACCTCTAATTCGTTTCGAGTCATTTTCTCCTA  
CCTAGAGCTCCCTTCAATCCAAAATCTCCACATATATCTTTTGTTTGTATTGATGT  
ATGGTTGACATAAATTCAATAAAGAAGTTGACGTTTTTCT

### **173\_atasiSUL**

AAACCTAAACCTAAACGGCTAAGCCCGACGTCAAATACCAAAAAGAGAAAAA  
CAAGAGCGCCGTCAAGCTCTGCAAATACGATCTGTAAGTCCATCTTAACACAAAAGT  
GAGATGGGTTCTTAGATCATGTTCCGCCGTTAGATCGAGTCATGGTCTTGTCTCATA  
GAAAGGTACTTTCGTTTACTTCTTTTGAGTATCGAGTAGAGCGTCGTCTATAGTTAG  
TTTGAGATTGCGTTTGTGAGAAGTTAGGTTCAATGTCCCGGTCCAATTTTACCAGC  
CATGTGTCAGTTTCGTTCCCTCCCGTCCTTCTTTGATTTTCGTTGGGTTACGGATG  
TTTTTCGAGATGAAACAGCATTGTTTTGTTGTGATTTTTCTCTACAAGCGAATAGACC



ATTTATCGGTGGATCTTAGAAAATTATTCTAAGTCCAACATAGCGTATTCTAAGTTC  
AACATATCGACGAACTAGAAAAGACATTGGACATATTCCAGGATATGCAAAAGAAAA  
CAATGAATATTGTTTTGAATGTGTTCAAGTAAATGAGATTTTCAAGTCGTCTAAAGA  
ACTTAAGTGTCACGGAAATCCCTTTTTCAATAAATAATTGGTTCTAATAATACAAAAC  
ATATTTCGAGGATATGCAGAAAAAAGATGTTTGTATTGAAAAGCTTGAGTAGTT  
TCTCTCCGAGGTGTAGCGAAGAAGCATCATCTACTTTGTAATGTAATTTTCTTTATG  
TTTTCACTTTGTAATTTTATTGTTAATGTACCATGGCCGATATCGGTTTTATTG  
AAAGAAAATTTATGTTACTTCTGTTTTGGCTTTGCAATCAGTTATGCTAGTTTTCTT  
ATACCCTTTCGTAAGCTTCCTAAGGAATCGTTCATTGATTTCCACTGCTTCATTGTA  
TATTAAACTTTACAACGTATCGACCATCATATAATTCTGGGTCAAGAGATGAAAA  
TAGAACACCACATCGTAAAGTGAAAT

### **173not\_atasiSUL**

AAACCTAAACCTAAACGGCTAAGCCCGACGTCAAATACCAAAAAGAGAAAAA  
CAAGAGCGCCGTCAAGCTCTGCAAATACGATCTGTAAGTCCATCTTAACACAAAAGT  
GAGATGGGTTCTTAGATCATGTTCCGCCGTTAGATCGAGTCATGGTCTTGTCTCATA  
GAAAGGTactttcgtttacTTCTTTTGAGTATCGAGTAGAGCGTCGTCTATAGTTAG  
TTTGAGATTGCGTTTGTGAGAAGTTAGGTTCAATGTCCCGGTCCAATTTTACCAGC  
CATGTGTCAGTTTCGTTCCCTCCCGTCCTCTTCTTTGATTTTCGTTGGGTTACGGATG  
TTTTTCGAGATGAAACAGCATTGTTTTGTTGTGATTTTTCTTAACAAGCGAATAGACC  
ATTTATCGGTGGATCTTAGAAAATTAttctaagtccaacatagcgtaTTCTAAGTTC  
AACATATCGACGAACTAGAAAAGACATTGGACATATTCCAGGATATGCAAAAGAAAA  
CAATGAATATTGTTTTGAATGTGTTCAAGTAAATGAGATTTTCAAGTCGTCTAAAGA  
ACTtaagtgtcacggaaatccctTTTTCAATAAATAATTGGTTCTAATAATACAAAAC  
ATATTTCGAGGatatgcagaaaaaaAGATGTTTGTATTGAAAAGCTTGAGTAGTT  
TCTCTCCGAGGTGTAGCGAAGAAGCATCATCTACTTTGTAATGTAATTTTCTTTATG  
TTTTCACTTTGTAATTTTATTGTTAATGTACCATGGCCGATATCGGTTTTATTG  
AAAGAAAATTTATGTTACTTCTGTTTTGGCTTTGCAATCAGTTATGCTAGTTTTCTT  
ATACCCTTTCGTAAGCTTCCTAAGGAATCGTTCATTGATTTCCACTGCTTCATTGTA  
TATTAAACTTTACAACGTATCGACCATCATATAATTCTGGGTCAAGAGATGAAAA  
TAGAACACCACATCGTAAAGTGAAAT

### **173del\_atasiSUL**

AAACCTAAACCTAAACGGCTAAGCCCGACGTCAAATACCAAAAAGAGAAAA  
CAAGAGCGCCGTCAAGCTCTGCAAATACGATCTGTAAGTCCATCTTAACACAAAAGT  
GAGATGGGTTCTTAGATCATGTTCCGCCGTTAGATCGAGTCATGGTCTTGTCTCATA  
GAAAGGTA CTTTCGTTTACTTCTTTTGAGTATCGAGTAGAGCGTCGTCTATAGTTAG  
TTTGAGATTGCGTTTGT CAGAAGTTAGGTTCAATGTCCCGGTCCAATTTTCACCAGC  
CATGTGTCAGTTTCGTTCCCTTCCCGTCCTCTTCTTTGATTTTCGTTGGGTTACGGATG  
TTTTCGAGATGAAACAGCATTGTTTTGTTACACCCCAGGAGAAACCCGACCTAGACC  
ATTTATCGGTGGATCTTAGAAAATTATTCTAAGTCCAACATAGCGTATTCTAAGTTC  
AACATATCGACGAACTAGAAAAGACATTGGACATATTCCAGGATATGCAAAAAGAAAA  
CAATGAATATTGTTTTGAATGTGTTCAAGTAAATGAGATTTTCAAGTCGTCTAAAGA  
ACTTAAGTGT CACGGAATCCCTTTTTCAATAAATAATTGGTTCTAATAATACAAAAC  
ATATTCGAGGATATGCAGAAAAAAGATGTTTGTTATTTTGAAAAGCTTGAGTAGTT  
TCTCTCCGAGGTGTAGCGAAGAAGCATCATCTACTTTGTAATGTAATTTTCTTTATG  
TTTTCACTTTGTAATTTTATTTGTGTTAATGTACCATGGCCGATATCGGTTTTTATTG  
AAAGAAAATTTATGTTACTTCTGTTTTGGCTTTGCAATCAGTTATGCTAGTTTTCTT  
ATACCCTTTCGTAAGCTTCCTAAGGAATCGTTCATTGATTTCCACTGCTTCATTGTA  
TATTAAA CTTTACA ACTGTATCGACCATCATATAATTCTGGGTCAAGAGATGAAAA  
TAGAACACCACATCGTAAAGTGAAAT

## Supplementary Material and Methods

### *Western blot analysis*

AGO1, AGO2 and AGO5 expression was detected by Western blot using specific antibodies. For AGO1 detection, 30ug of protein was used, while 75ug was utilized for AGO2 and AGO5 experiments. *ago1-36*, *ago2-1* and *ago5-1* were described respectively in Baumberger and Baulcombe, 2005 (PNAS), Lobbes et al, 2006 (EMBO rep) and Katiyar-Agarwal et al, 2007 (Genes and Dev).

### *tasiRNA-5D2(-) RACE*

RACE to detect tasiRNA-5D2(-) cleavage site was done as described in the material and methods section. cDNA was synthesized using a TAS3 specific gene (5'- AGAAAAACGTCAACTTCTTTAT). First round and nested PCR were performed using the adaptor specific primers (described in the main section) and TAS3-specific primers (5'- CTTCTTTATTGAATTTATGTC and 5'- AACCATACATCAATAACAAAC).

*Contribution of the original atasiSUL reporter transgene and the endogenous TAS3 to the total amount of tasiRNA species found in the libraries.*

To determine the contribution of the original atasiSUL reporter transgene and the endogenous TAS3 to the total amount of tasiRNA species found in the libraries we took in consideration the regions shown in Figure S5B, which in the reporter constructs contain the sequence originating the atasiSUL. We first retrieved all reads that corresponded to these regions. Next we determined how many sequences could be specifically defined as originating from either the transgene or the endogenous TAS3.

**Table S1.** Oligonucleotide sequences.

| <b>Purpose</b>                                           | <b>Sequence</b>                        |
|----------------------------------------------------------|----------------------------------------|
| <b><i>small RNAs</i></b>                                 |                                        |
| atasiSUL                                                 | TTA AGT GTC ACG GAA ATC CCT            |
| <b><i>Probes for sRNA blots</i></b>                      |                                        |
| atasiSUL                                                 | AGG GAT TTC CGT GAC ACT TAA            |
| U6 (loading control)                                     | AGG GGC CAT GCT AAT CTT CTC            |
| miR159                                                   | TAG AGC TCC CTT CAA TCC AAA            |
| miR173                                                   | GTG ATT TCT CTC TGC AAG CGA A          |
| miR390                                                   | GGC GCT ATC CCT CCT GAG CTT            |
| TAS1_long, forward                                       | TTC GTT GGG TTA CGG ATG TTT TCG AGA TG |
| TAS1_long, reverse                                       | ATT TCA CTT TAC GAT GTG GT             |
| TAS3_long, forward                                       | GGA TCC GCT GTG CTG AGA CAT TGA G      |
| TAS3_long, reverse                                       | AAA AGA TAT ATG TGG AGA TTA            |
| <b><i>RT-PCR and RT-qPCR</i></b>                         |                                        |
| <i>ACT2</i> , forward                                    | GCA CCC TGT TCT TCT TAC CG             |
| <i>ACT2</i> , reverse                                    | AAC CCT CGT AGA TTG GCA CA             |
| <i>GAPC</i> , forward                                    | ACT CAA TCA CTG CTA CTC AG             |
| <i>GAPC</i> , reverse                                    | GTC AAC TTT CCG TTA AGA GC             |
| <i>CH42 (SUL)</i> , forward                              | GCA GGA CAA GCT TCA AGA CC             |
| <i>CH42 (SUL)</i> , reverse                              | CGG TGC CTT AAG CAG TTA GG             |
| <i>TAS3</i> -based reporter, forward                     | GCA TTA AGG AAA ACA TAA CC             |
| <i>TAS3</i> -based reporter, reverse (atasiSUL-specific) | AGG GAT TTC CGT GAC ACT TAA            |

---

**5'-RACE**

|                                   |                                                               |
|-----------------------------------|---------------------------------------------------------------|
| 5'-RNA adaptor                    | CGA CUG GAG CAC GAG GAC ACU GAC AUG GAC UGA AGG<br>AGU AGA AA |
| Specific Oligo for cDNA synthesis | AGG GAT TTC CGT GAC ACT TAA                                   |
| 5'-RNA adaptor first PCR primer   | CGA CTG GAG CAC GAG GAC ACT GA                                |
| 5'-RNA adaptor nested PCR primer  | GGA CAC TGA CAT GGA CTG AAG GAG TA                            |
| TAS1 PCR primer                   | AGG GAT TTC CGT GAC ACT TAA GTT C                             |
| TAS1 nested PCR primer            | TAA TTT TCT AAG ATC CAC CGA TAA ATG GTC                       |
| TAS3 PCR primer                   | AGG GAT TTC CGT GAC ACT TAA GGT C                             |
| TAS3 nested PCR primer            | CAC AAT AAT TGA AAA GAA AAA ATC CGA C                         |
| M13, forward                      | TGT AAA ACG ACG GCC AGT                                       |
| pJet1, Forward                    | ACT ACT CGA TGA GTT TTC GG                                    |
